# Supplementary material for: Intratumoral and Peritumoral Radiomics of Contrast-Enhanced CT for Prediction of Disease-Free Survival and Chemotherapy Response in Stage II/III Gastric Cancer
Source: PubMed Central journal article supplement (PMC7794018; doi:10.3389/fonc.2020.552270), 2020-12-04
Supplement: DataSheet_1.pdf [file DataSheet_1.pdf]

## **Supplementary Materials**

- I. Supplementary methods**
- II. Supplementary reference**
- III. Supplementary figures**
- IV. Supplementary tables**
- V. Definition of image features**

## **1. CT image acquisition and retrieving procedure**

All patients underwent contrast-enhanced abdominal CT using the multidetector row CT (MDCT) systems (64-section LightSpeed VCT, GE Medical Systems, Milwaukee, Wis). The acquisition parameters are as follows: 120 kV; 150-190 mAs; 0.5- or 0.4-second rotation time; detector collimation:  $64 \times 0.625$  mm; field of view,  $350 \times 350$  mm; matrix,  $512 \times 512$ . After routine non-enhanced CT, arterial and portal venous-phase contrast-enhanced CT were performed after delays of 28 s and 60 s following intravenous administration of 90 - 100 ml of iodinated contrast material (Ultravist 370, Bayer Schering Pharma, Berlin, Germany) at a rate of 3.0 or 3.5 ml/s with a pump injector (Ulrich CT Plus 150, Ulrich Medical, Ulm, Germany). Contrast-enhanced CT was reconstructed with a reconstruction thickness of 2.5 mm.

Portal venous phase CT images (thickness: 2.5 mm) were retrieved from the picture archiving and communication system (PACS) (Carestream, Canada) for image feature extraction because of well differentiation of the tumor tissue from the adjacent normal bowel wall.

## **2. Image Processing**

We analyzed the portal venous-phase CT images because of well differentiation between the tumor tissue and adjacent normal bowel wall. The relatively coarse and heterogeneous resolution in z-axis compared with in-plane resolution would not allow a meaningful and reliable 3D analysis of the image. Therefore, we focused on the most representative 2D slice, i.e., largest tumor section in the axial plane. Two radiologists (with 5 and 6 years of clinical experience in abdominal CT interpretation,

respectively) manually delineated the primary tumor on the CT images by using the ITK-SNAP (<http://www.itksnap.org>). Both radiologists were blinded to the clinical and histopathological data but were aware that the patients had gastric cancer. All tumor contours were delineated by the two radiologists in consensus.

### **3. The SVM based Radiomic Signature**

SVM, a method for building a classifier, aims to create a decision boundary between two classes that enables prediction of labels from one or more feature vectors.[1] This decision boundary, known as the hyperplane, is orientated in such a way that it is as far as possible from the closest data points from each of the classes. These closest points are called support vectors. In this study, we addressed the DFS prediction problem of GC as a classification problem where the input was a vector that we call a “pattern” of  $n$  components which were called “features”. The features consisted of 584 radiomics feature in total. Each pattern corresponds to a patient. We limited ourselves to a two-class classification problem (i.e., whether a patient’s DFS was longer than 5 years or not). The recursive feature elimination method was applied for features selection and ranking in the training dataset.[2] The pruning method was applied to exclude useless features. On the basis of the SVM analysis in the training data of 286 patients, the RS-SVM signature integrated 26 predictors, including 8 margin features and 18 intratumoral features. The 8 margin features were CTmax, CTmedian, GLSZM\_LZLGE, NGTDM\_Strength, GLSZM\_GLN\_1.5, GLSZM\_LZE\_2.0, GLSZM\_GLN\_2.0, GLRLM\_RP\_2.5. The 18 margin features were GLCM\_ClusterShade, GLCM\_InverseVariance, GLCM\_MaximumProbability,

GLSZM\_ZSN, GLSZM\_LGZE, NGTDM\_Contrast, GLCM\_DifferenceVariance\_1.0,  
GLCM\_IMC2\_1.0, GLRLM\_LRE\_1.0, GLCM\_DifferenceEntropy\_1.5,  
GLCM\_Correlation\_2.0, GLRLM\_RP\_2.0, GLRLM\_LGRE\_2.0,  
GLRLM\_LRLGE\_2.0, GLSZM\_ZSV\_2.0, GLCM\_IMC2\_2.5,  
NGTDM\_Contrast\_2.5, NGTDM\_Complexity\_2.5.

#### **4. R Software Packages Used for Statistical Analysis**

Survival analysis was performed with the “survival” package. Multivariate Cox regression, nomograms, and calibration plots were generated with the “rms” package. Comparisons between C-indexes were performed with the “Hmisc” package. The “survIDINRI” package was used for the calculation of net reclassification improvement. Decision curve analysis was performed with the function of “dca.R”. Reported statistical significance levels were all two-sided. The statistical significance level was set at 0.05.

#### **Reference**

1. Noble WS. What is a support vector machine? *Nat Biotechnol* 2006; 24: 1565-1567.
2. Wang HY, Sun BY, Zhu ZH et al. Eight-signature classifier for prediction of nasopharyngeal [corrected] carcinoma survival. *J Clin Oncol* 2011; 29: 4516-4525.

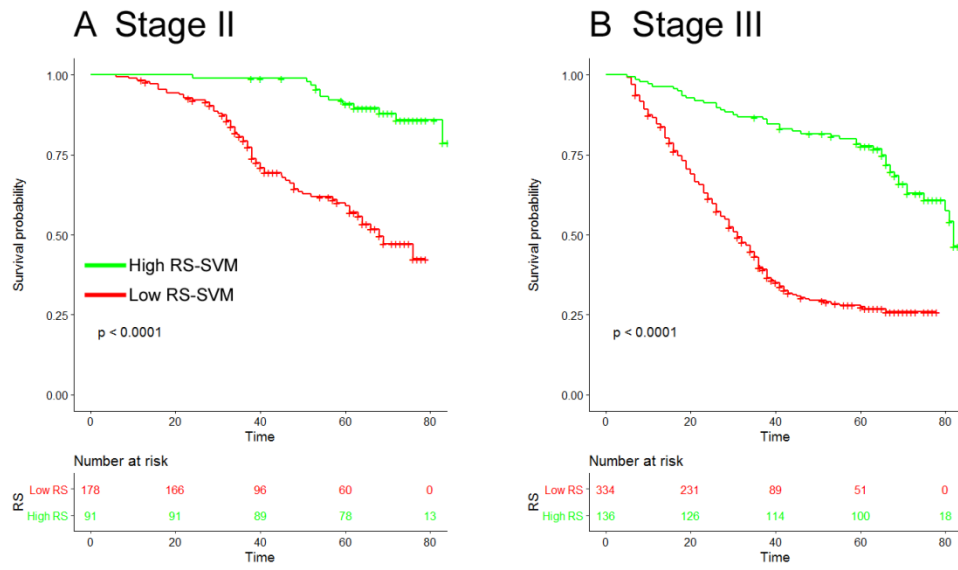

**Figure S1. Kaplan-Meier survival analyses of disease-free survival according to the dichotomized RS in stage II and III patients. A, Stage II ( $n=269$ ); (B) Stage III ( $n=470$ ).**

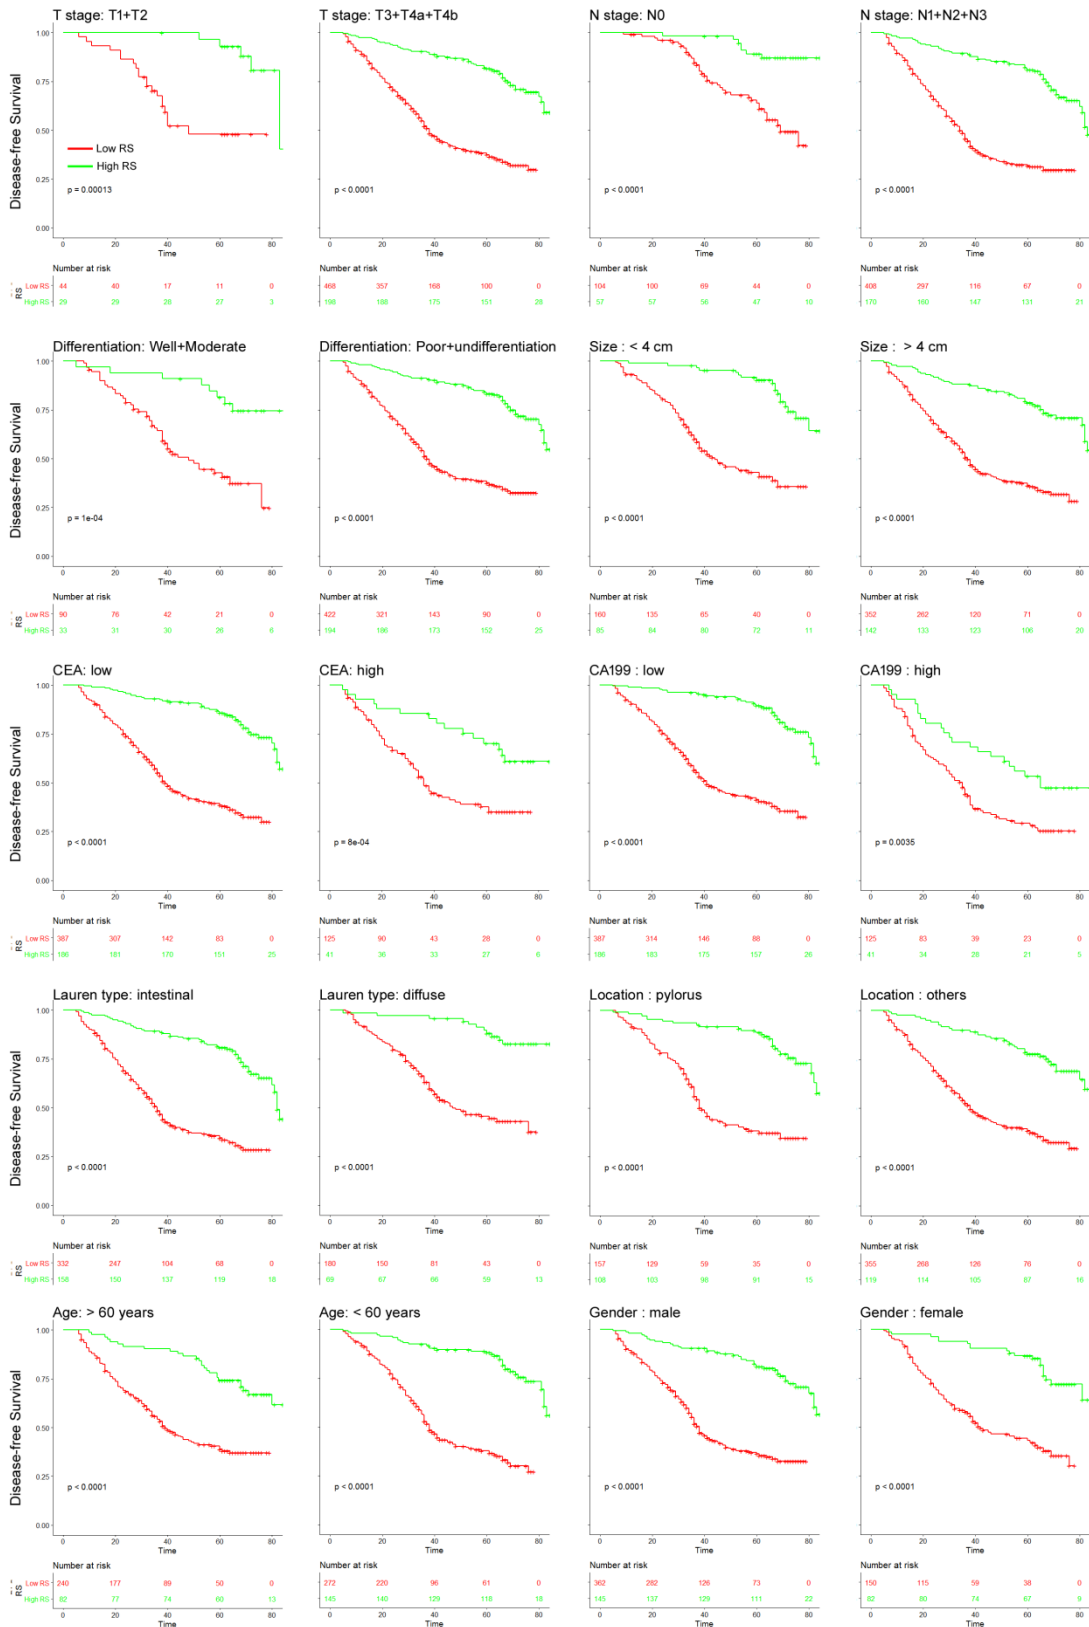

**Figure S2. Kaplan-Meier survival analysis of DFS for 739 patients in the validation cohort according to the RS stratified by clinicopathological risk factors. P-values were calculated by log-rank test.**

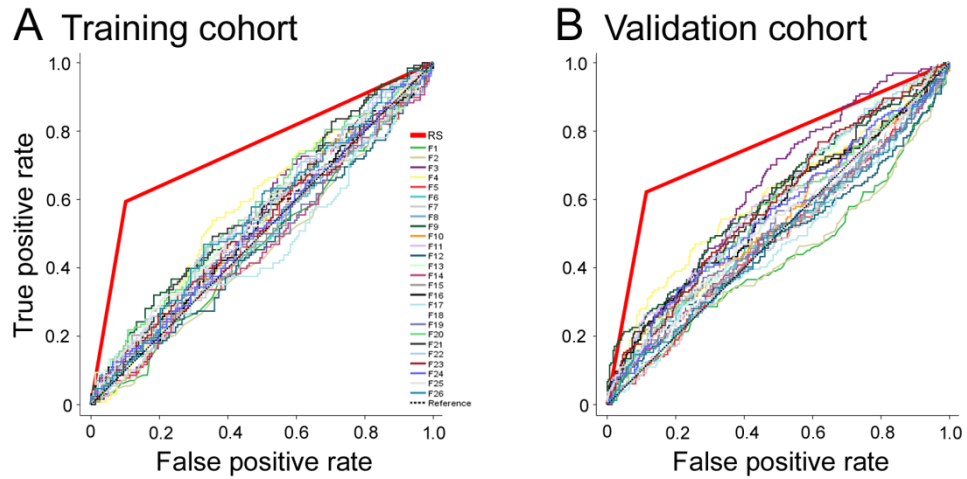

**Figure S3. Receiver operating characteristic (ROC) curves of 5-year disease-free survival for the 26 selected features and RS in the training and validation cohorts. RS, radiomic score.**

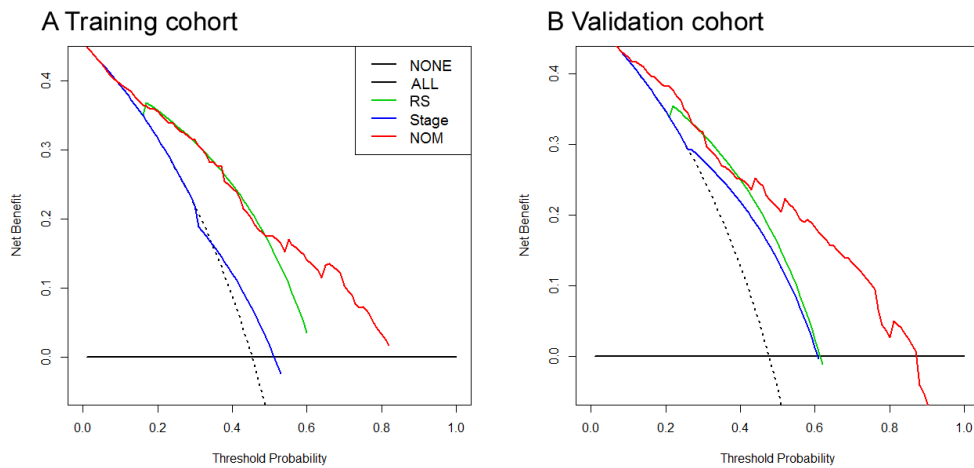

**Figure S4. Decision curve analysis of each model for predicting the survival in the training and validation cohorts. (A), training cohort; (B), validation cohort. The y-axis measures the net benefit, and the red line represents integrated nomograms. RS, radiomic score.**

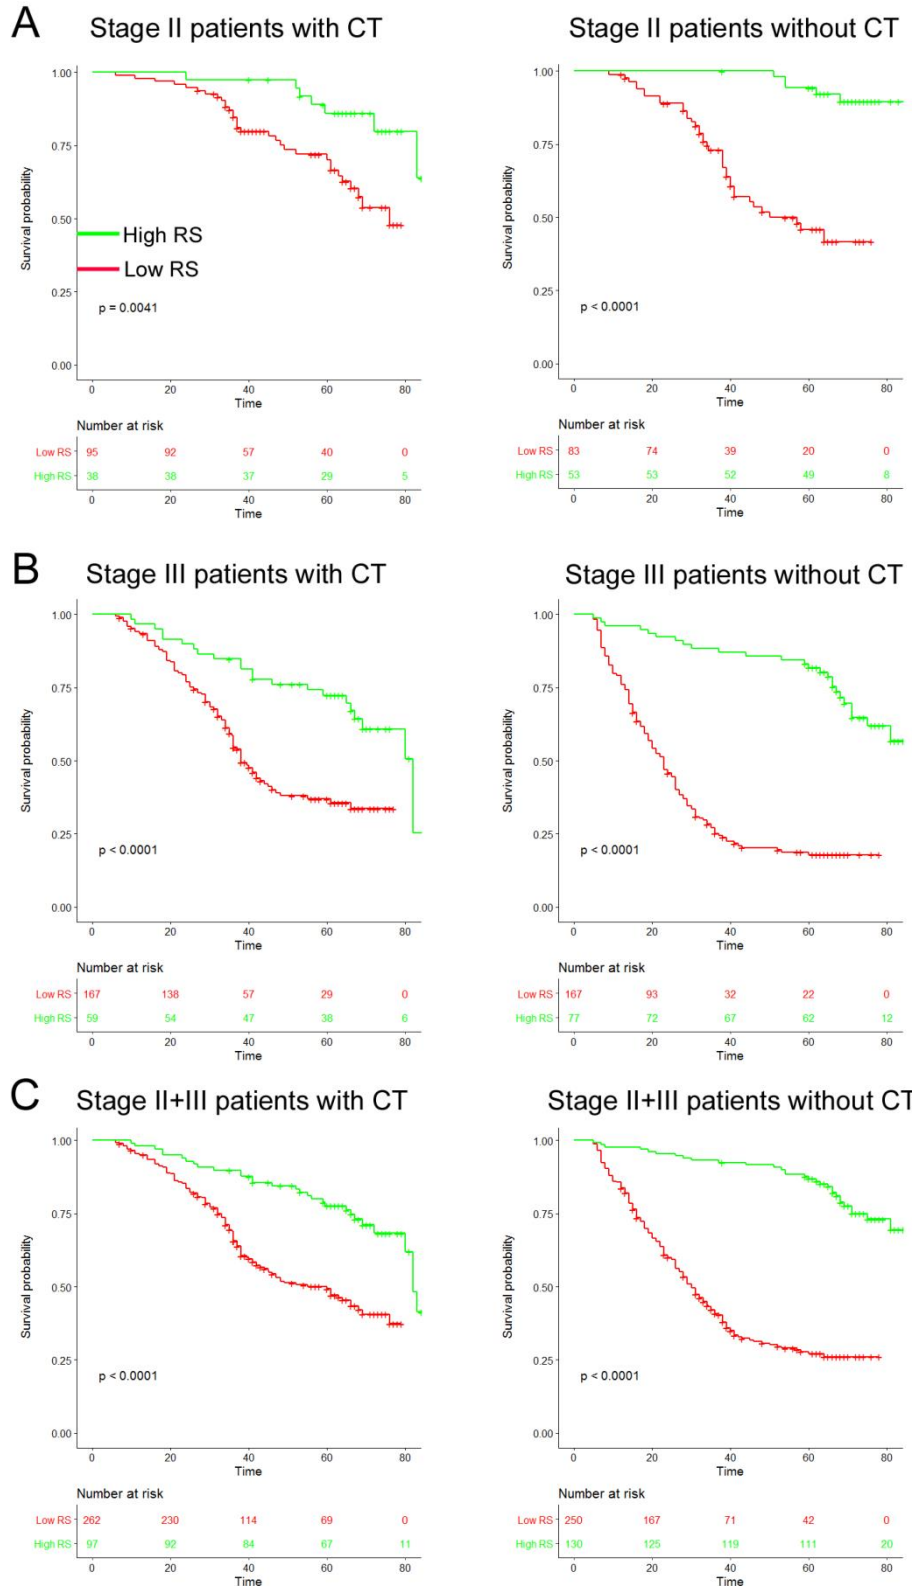

**Figure S5.** Kaplan-Meier analysis of disease-free survival in patients received postsurgical chemotherapy (CT) according to Rad-score (RS). Left panel: CT patients; right panel: no CT patients. (A) training cohort ( $n = 286$ ), (B) validation cohort ( $n = 453$ ), (C) combined cohort ( $n = 739$ ).  $P$ -value was calculated by log-rank test.



**Table S1.** Clinical characteristics of patients according to the SVM signature in the training and validation cohorts.

| Variables                          | Training cohort<br>(n = 223) |               |          | Validation cohort<br>(n = 218) |               |          |
|------------------------------------|------------------------------|---------------|----------|--------------------------------|---------------|----------|
|                                    | low SVM                      | high SVM      | <i>P</i> | low SVM                        | high SVM      | <i>P</i> |
| <b>Gender</b>                      |                              |               | 0.353    |                                |               | 0.555    |
| Male                               | 103(62.8)                    | 61(37.2)      |          | 79(57.7)                       | 58(42.3)      |          |
| Female                             | 33(55.9)                     | 26(44.1)      |          | 50(61.7)                       | 31(38.3)      |          |
| <b>Age(years),<br/>median(IQR)</b> | 57<br>(49-65)                | 58<br>(51-63) |          | 55<br>(46-63)                  | 54<br>(49-64) |          |
| <b>Age(years)</b>                  |                              |               | 0.496    |                                |               | 0.85     |
| <60                                | 75(59.1)                     | 52(40.9)      |          | 81(58.7)                       | 57(41.3)      |          |
| ≥60                                | 61(63.5)                     | 35(36.5)      |          | 48(60.0)                       | 32(40.0)      |          |
| <b>Tumor size(cm)</b>              |                              |               | 0.129    |                                |               | 0.011    |
| <4                                 | 64(56.1)                     | 50(43.9)      |          | 39(48.1)                       | 42(51.9)      |          |
| ≥4                                 | 72(66.1)                     | 37(33.9)      |          | 90(65.7)                       | 47(34.3)      |          |
| <b>Tumor location</b>              |                              |               | 0.064    |                                |               | 0.514    |
| Cardia                             | 26(59.1)                     | 18(40.9)      |          | 23(59.0)                       | 16(41.0)      |          |
| Body                               | 24(72.7)                     | 9(27.3)       |          | 21(51.2)                       | 20(48.8)      |          |
| Antrum                             | 63(54.3)                     | 53(45.7)      |          | 63(59.4)                       | 43(40.6)      |          |
| Whole                              | 23(76.7)                     | 7(23.3)       |          | 22(68.8)                       | 10(31.3)      |          |
| <b>Differentiation status</b>      |                              |               | 0.004    |                                |               | 0.273    |
| Well+moderate                      | 56(51.4)                     | 53(48.6)      |          | 47(54.7)                       | 39(45.3)      |          |
| Poor and<br>undifferentiated       | 80(70.2)                     | 34(29.8)      |          | 82(62.1)                       | 50(37.9)      |          |
| <b>Lauren type</b>                 |                              |               | 0.057    |                                |               | 0.165    |
| Intestinal type                    | 103(57.9)                    | 75(42.1)      |          | 94(62.3)                       | 57(37.7)      |          |
| Diffuse type                       | 33(73.3)                     | 12(26.7)      |          | 35(52.2)                       | 32(47.8)      |          |
| <b>CEA</b>                         |                              |               | 0.118    |                                |               | 0.68     |
| Elevated                           | 41(69.5)                     | 18(30.5)      |          | 26(56.5)                       | 20(43.5)      |          |
| Normal                             | 95(57.9)                     | 69(42.1)      |          | 103(59.9)                      | 69(40.1)      |          |
| <b>CA199</b>                       |                              |               | 0.099    |                                |               | 0.296    |
| Elevated                           | 47(69.1)                     | 21(30.9)      |          | 34(65.4)                       | 18(34.6)      |          |
| Normal                             | 89(57.4)                     | 66(42.6)      |          | 95(57.2)                       | 71(42.8)      |          |
| <b>Depth of invasion</b>           |                              |               | 0.042    |                                |               | 0.005    |
| T1                                 | 5(45.5)                      | 6(54.5)       |          | 4(36.4)                        | 7(63.6)       |          |
| T2                                 | 15(48.4)                     | 16(51.6)      |          | 10(41.7)                       | 14(58.3)      |          |
| T3                                 | 9(64.3)                      | 5(35.7)       |          | 9(40.9)                        | 13(59.1)      |          |
| T4a                                | 72(58.5)                     | 51(41.5)      |          | 65(60.7)                       | 42(39.3)      |          |
| T4b                                | 35(79.5)                     | 9(20.5)       |          | 41(75.9)                       | 13(24.1)      |          |
| <b>Lymph node metastasis</b>       |                              |               | 0.047    |                                |               | 0.022    |
| N0                                 | 14(40.0)                     | 21(60.0)      |          | 24(47.1)                       | 27(52.9)      |          |
| N1                                 | 28(57.1)                     | 21(42.9)      |          | 23(50.0)                       | 23(50.0)      |          |
| N2                                 | 56(66.7)                     | 28(33.3)      |          | 35(60.3)                       | 23(39.7)      |          |

|                     |           |          |         |          |          |       |
|---------------------|-----------|----------|---------|----------|----------|-------|
| N3a                 | 29(70.7)  | 12(29.3) |         | 30(71.4) | 12(28.6) |       |
| N3b                 | 9(64.3)   | 5(35.7)  |         | 17(81.0) | 4(19.0)  |       |
| <b>Stage</b>        |           |          | <0.0001 |          |          | 0.001 |
| II                  | 32(42.7)  | 43(57.3) |         | 31(43.1) | 41(56.9) |       |
| III                 | 104(70.3) | 44(29.7) |         | 98(67.1) | 48(32.9) |       |
| <b>Chemotherapy</b> |           |          | 0.329   |          |          | 0.509 |
| No                  | 84(63.6)  | 48(36.4) |         | 58(61.7) | 36(38.3) |       |
| Yes                 | 52(57.1)  | 39(42.9) |         | 71(57.3) | 53(42.7) |       |

---

**Table S2.** Univariable analysis of the RS-SVM classifier, patient characteristics and disease-free survival in the training and validation cohorts.

| Variable                              | Training cohort     |           | Validation cohort   |           |
|---------------------------------------|---------------------|-----------|---------------------|-----------|
|                                       | HR (95%CI)          | <i>P</i>  | HR (95%CI)          | <i>P</i>  |
| Age(years) ( $\geq 60$ vs. $<60$ )    | 1.110 (0.783-1.574) | 0.558     | 1.180 (0.910-1.530) | 0.212     |
| Gender (male vs. female)              | 1.257 (0.849-1.862) | 0.252     | 1.161 (0.877-1.539) | 0.297     |
| Tumor size ( $>4$ cm vs. $\leq 4$ cm) | 1.727 (0.808-1.173) | 0.005     | 1.201 (0.903-1.596) | 0.208     |
| Tumor location                        | 0.973 (0.973-1.364) | 0.777     | 1.160 (1.014-1.327) | 0.03      |
| Differentiation status                | 1.226 (0.783-1.922) | 0.373     | 1.036 (0.723-1.486) | 0.846     |
| Lauren type                           | 1.728 (1.185-2.520) | 0.004     | 1.234 (0.921-1.651) | 0.158     |
| CEA(ng/ml) (elevated vs. normal)      | 1.575 (1.083-2.289) | 0.017     | 1.143 (0.834-1.568) | 0.406     |
| CA199(U/ml) (elevated vs. normal)     | 1.962 (1.302-2.956) | 0.001     | 1.754 (1.333-2.308) | $<0.0001$ |
| Depth of invasion                     | 1.372 (1.179-1.598) | $<0.0001$ | 1.269 (1.125-1.430) | $<0.0001$ |
| Lymph node metastasis                 | 1.424 (1.236-1.639) | $<0.0001$ | 1.497 (1.352-1.658) | $<0.0001$ |
| Stage (III vs. II)                    | 2.069 (1.386-3.088) | $<0.0001$ | 3.082 (2.250-4.222) | $<0.0001$ |
| RS-SVM (high vs. low)                 | 0.190 (0.112-0.324) | $<0.0001$ | 0.252 (0.177-0.360) | $<0.0001$ |

**Table S3. Clinical characteristics of patients according to the chemotherapy in stage II and III patients.**

| Variables                      | Number | No chemotherapy<br>(N=380) |        | Chemotherapy<br>(N=359) |        | P-value |
|--------------------------------|--------|----------------------------|--------|-------------------------|--------|---------|
|                                |        | No.                        | %      | No.                     | %      |         |
| <b>Gender</b>                  |        |                            |        |                         |        | 0.716   |
| Female                         | 232    | 117                        | 50.43% | 115                     | 49.57% |         |
| Male                           | 507    | 263                        | 51.87% | 244                     | 48.13% |         |
| <b>Age(years), median(IQR)</b> |        | 58(51-65)                  |        | 57(48-65)               |        |         |
| <b>Age(years)</b>              |        |                            |        |                         |        | 0.51    |
| <60                            | 417    | 210                        | 50.36% | 207                     | 49.64% |         |
| ≥60                            | 322    | 170                        | 52.80% | 152                     | 47.20% |         |
| <b>Tumor size(cm)</b>          |        |                            |        |                         |        | 0.272   |
| <4                             | 245    | 133                        | 54.29% | 112                     | 45.71% |         |
| ≥4                             | 494    | 247                        | 50.00% | 247                     | 50.00% |         |
| <b>Tumor location</b>          |        |                            |        |                         |        | 0.69    |
| Cardia                         | 293    | 151                        | 51.54% | 142                     | 48.46% |         |
| Body                           | 146    | 69                         | 47.26% | 77                      | 52.74% |         |
| Antrum                         | 265    | 141                        | 53.21% | 124                     | 46.79% |         |
| Whole                          | 35     | 19                         | 54.29% | 16                      | 45.71% |         |
| <b>Differentiation status</b>  |        |                            |        |                         |        | 0.882   |
| Well+Moderate                  | 123    | 64                         | 52.03% | 59                      | 47.97% |         |
| Poor and undifferentiated      | 616    | 316                        | 51.30% | 300                     | 48.70% |         |
| <b>Lauren type</b>             |        |                            |        |                         |        | 0.433   |
| Intestinal type                | 249    | 123                        | 49.40% | 126                     | 50.60% |         |
| Diffuse or mixed type          | 490    | 257                        | 52.45% | 233                     | 47.55% |         |
| <b>CEA</b>                     |        |                            |        |                         |        | 0.95    |
| Normal                         | 573    | 295                        | 51.48% | 278                     | 48.52% |         |
| Elevated                       | 166    | 85                         | 51.20% | 81                      | 48.80% |         |
| <b>CA199</b>                   |        |                            |        |                         |        | 0.32    |
| Normal                         | 573    | 289                        | 50.44% | 284                     | 49.56% |         |
| Elevated                       | 166    | 91                         | 54.82% | 75                      | 45.18% |         |
| <b>Depth of invasion</b>       |        |                            |        |                         |        | 0.001   |
| T1                             | 16     | 7                          | 43.75% | 9                       | 56.25% |         |
| T2                             | 57     | 29                         | 50.88% | 28                      | 49.12% |         |
| T3                             | 200    | 59                         | 29.50% | 141                     | 70.50% |         |
| T4a                            | 413    | 254                        | 61.50% | 159                     | 38.50% |         |
| T4b                            | 53     | 31                         | 58.49% | 22                      | 41.51% |         |
| <b>Lymph node metastasis</b>   |        |                            |        |                         |        | 0.162   |
| N0                             | 161    | 91                         | 56.52% | 70                      | 43.48% |         |
| N1                             | 145    | 68                         | 46.90% | 77                      | 53.10% |         |
| N2                             | 157    | 73                         | 46.50% | 84                      | 53.50% |         |

|              |     |     |        |     |        |       |
|--------------|-----|-----|--------|-----|--------|-------|
| N3a          | 190 | 97  | 51.05% | 93  | 48.95% |       |
| N3b          | 86  | 51  | 59.30% | 35  | 40.70% |       |
| <b>Stage</b> |     |     |        |     |        | 0.722 |
| II           | 269 | 136 | 50.56% | 133 | 49.44% |       |
| III          | 470 | 244 | 51.91% | 226 | 48.09% |       |

## Definition of image features

### ● *Intensity features-14*

where  $p(i)$  is the probability of occurrence of voxels with intensity  $i$

1. CT\_min: minimum of CT image
2. CT\_max: maximum of CT image
3. CT\_mean: mean of CT image
4. CT\_median: median of CT image
5. CT\_std: Standard Deviation of CT image
6. Hist\_Skewness:  
the asymmetry of the grey-level distribution in the histogram
7. Hist\_Kurtosis:  
reflects the shape of the grey-level distribution (peaked or flat) relative to a normal distribution.
8. Hist\_Entropy:

$$entropy\_hist = -\sum_{i=1} p(i) \log_2[p(i)]$$

9. Hist\_Consistency:

$$consistency\_hist = -\sum_{i=1} p(i)^2$$

10. Hist\_Energy:

$$energy\_hist = \sum_{i=1} p(i)^2$$

11. CT\_range: the range of CT image
12. Hist\_Var:  
Variance of CT image
13. CT\_RMS: root mean square, the quadratic mean, or the square root of the mean of squares of CT image
14. CT\_MAD: Mean absolute deviation, the mean of the absolute deviations of CT image around the mean CT value.

### ● *Shape features-8*

Shape features, describing the shape and size of the volume of interest. Let  $M$  as the number

of voxels in the tumor.

Using “regionprops” in Matlab.

15. Area: Actual number of pixels in the region, returned as a scalar.
16. Orientation: Angle between the x-axis and the major axis of the ellipse that has the same second-moments as the region, returned as a scalar. The value is in degrees, ranging from -90 degrees to 90 degrees.
17. Eccentricity: Eccentricity of the ellipse that has the same second-moments as the region, returned as a scalar.
18. Equivdiameter: Diameter of a circle with the same area as the region, returned as a scalar.  $\sqrt{4 \cdot \text{Area} / \pi}$
19. Solidity: Proportion of the pixels in the convex hull that are also in the region, returned as a scalar.  
 $\text{Area} / \text{ConvexArea}$
20. Extent: Ratio of pixels in the region to pixels in the total bounding box, returned as a scalar.  
Area divided by the area of the bounding box
21. Eulernumber: Number of objects in the region minus the number of holes in those objects.
22. Perimeter: Distance around the boundary of the region.

- **Gray Level Co-occurrence Matrix-based features (GLCM)-23**

Gray level co-occurrence matrix-based features, as described by study. The element  $P(i, j)$  of normalized co-occurrence matrix represent the number of times that intensity  $i$  and  $j$  appeared in two voxels separated by distance  $D$  in direction  $\theta$ . The co-occurrence matrix is given by:

$$P(i, j) = \# \{ (I(x, y, z) = i, I(k, l, m) = j) / D, \theta \}$$

where  $\#$  represents the number of times,  $I$  represents the voxel intensity,  $(x, y, z)$  and  $(k, l, m)$  are the coordinates (positions) of two different voxels, the direction vector is thus determined by  $(k, l, m) - (x, y, z)$ ,  $N_g$  is the number of discrete intensity levels in the image, and  $\mu$  is the mean of  $P(i, j)$ . The feature is derived by considering all the 13 directions simultaneously, thus arriving at a single matrix.

Let us define:

$$\mu_x = \sum_{i=1}^{N_g} i \sum_{j=1}^{N_g} P(i, j) \quad \mu_y = \sum_{j=1}^{N_g} j \sum_{i=1}^{N_g} P(i, j)$$

$$\sigma_x = \sqrt{\sum_{i=1}^{N_g} (i - \mu_x)^2 \sum_{j=1}^{N_g} P(i, j)} \quad \sigma_y = \sqrt{\sum_{j=1}^{N_g} (j - \mu_y)^2 \sum_{i=1}^{N_g} P(i, j)}$$

$$p_x(i) = \sum_{j=1}^{N_g} P(i, j) \quad p_y(j) = \sum_{i=1}^{N_g} P(i, j)$$

$$p_{x+y}(k) = \sum_{i=1}^{N_g} \sum_{j=1}^{N_g} P(i, j), \quad i + j = k, k = 2, 3, \dots, 2N_g$$

$$p_{x-y}(k) = \sum_{i=1}^{N_g} \sum_{j=1}^{N_g} P(i, j), \quad |i - j| = k, k = 0, 1, \dots, N_g - 1$$

$$\mu_{x-y} = \sum_{k=0}^{N_g-1} k P_{x-y}(k)$$

$$HXY1 = - \sum_{i=1}^{N_g} \sum_{j=1}^{N_g} P(i, j) \log_2(p_x(i) p_y(j))$$

$$HXY2 = - \sum_{i=1}^{N_g} \sum_{j=1}^{N_g} P_x(i) P_y(j) \log_2(p_x(i) p_y(j))$$

$$HX = - \sum_{i=1}^{N_g} p_x(i) \log_2[p_x(i)] \quad HY = - \sum_{j=1}^{N_g} p_y(j) \log_2[p_y(j)]$$

$$H = - \sum_{i=1}^{N_g} \sum_{j=1}^{N_g} p(i, j) \log_2[p(i, j)]$$

The various radiomics features based on the co-occurrence matrix are then defined as:

1. Auto correlation (AutoCorrelation):

$$auto\ correlation = \sum_{i=1}^{N_g} \sum_{j=1}^{N_g} ij p(i, j)$$

2. Cluster prominence (ClusterPro):

$$cluster\ prominence = \sum_{i=1}^{N_g} \sum_{j=1}^{N_g} [i + j - \mu_x - \mu_y]^4 P(i, j)$$

3. Cluster shade (ClusterShade):

$$cluster\ shade = \sum_{i=1}^{N_g} \sum_{j=1}^{N_g} [i + j - \mu_x - \mu_y]^3 P(i, j)$$

4. Cluster tendency (ClusterTen):

$$cluster\ tendency = \sum_{i=1}^{N_g} \sum_{j=1}^{N_g} [i + j - \mu_x - \mu_y]^2 P(i, j)$$

5. Contrast:

$$contrast = \sum_{i=1}^{N_g} \sum_{j=1}^{N_g} |i - j|^2 P(i, j)$$



6. Correlation:

$$correlation = \frac{\sum_{i=1}^{N_g} \sum_{j=1}^{N_g} (i - \mu_x)(j - \mu_y) P(i, j)}{\sigma_x \sigma_y} = \frac{\sum_{i=1}^{N_g} \sum_{j=1}^{N_g} ij P(i, j) - \mu_x \mu_y}{\sigma_x \sigma_y}$$

7. Difference entropy (DiffEntropy):

$$difference\ entropy = - \sum_{k=0}^{N_g-1} P_{x-y}(k) \log_2 [P_{x-y}(k)]$$

8. Difference Variance (DiffVar):

$$difference\ variance = - \sum_{k=0}^{N_g-1} (k - \mu_{x-y})^2 P_{x-y}(k) \quad \mu_{x-y} = \sum_{k=0}^{N_g-1} k P_{x-y}(k)$$

9. Dissimilarity:

$$dissimilarity = \sum_{i=1}^{N_g} \sum_{j=1}^{N_g} |i - j| P(i, j)$$

10. Energy, called Uniformity in[1], also called Angular second moment in[1]:

$$energy = \sum_{i=1}^{N_g} \sum_{j=1}^{N_g} [P(i, j)]^2$$

11. Entropy:

$$entropy = - \sum_{i=1}^{N_g} \sum_{j=1}^{N_g} P(i, j) \log_2 [P(i, j)]$$

12. Homogeneity, also called Inverse difference in[1] :

$$homogeneity = \sum_{i=1}^{N_g} \sum_{j=1}^{N_g} \frac{P(i, j)}{1 + |i - j|}$$

13. Informational measure of correlation 1 (IMC1):

$$IMC1 = \frac{H - HXY1}{\max \{HX, HY\}}$$

Where  $HX$  and  $HY$  are the entropies of  $p_x(i)$  and  $p_y(j)$ .

14. Informational measure of correlation 2 (IMC2):

$$IMC2 = \sqrt{1 - e^{-2(HXY2 - H)}}$$

where  $H$  is the entropy of  $p(i, j)$ .

15. Inverse Difference Normalized (IDN):

$$IDN = \sum_{i=1}^{N_g} \sum_{j=1}^{N_g} \frac{P(i, j)}{1 + \left( \frac{|i-j|}{N} \right)}$$

16. Inverse Difference Moment Normalized (IDMN):

$$IDMN = \sum_{i=1}^{N_g} \sum_{j=1}^{N_g} \frac{P(i, j)}{1 + \left( \frac{|i-j|^2}{N^2} \right)}$$

17. Inverse variance (InVar):

$$inverse\ variance = \sum_{i=1}^{N_g} \sum_{j=1}^{N_g} \frac{P(i, j)}{|i-j|^2}, i \neq j$$

18. Maximum probability (MaxPossibility):

$$maximum\ probability = \max \{P(i, j)\}$$

19. Sum average2:

$$sum\ average2 = \sum_{k=2}^{2N_g} [kP_{x+y}(k)]$$

20. Sum entropy (SumEntropy):

$$sum\ entropy = - \sum_{k=2}^{2N_g} P_{x+y}(k) \log_2 [P_{x+y}(k)]$$

21. Sum variance (SumVar):

$$sum\ variance = \sum_{k=2}^{2N_g} (k - SA)^2 P_{x+y}(k)$$

where SA is Sum average2.

22. Variance:

$$variance = \frac{1}{N_g \times N_g} \sum_{i=1}^{N_g} \sum_{j=1}^{N_g} [(i - \mu_x)^2 + (j - \mu_y)^2] p(i, j)$$

- **Gray Level Run Length Matrix-based features (GLRLM)-13**

Gray level run length matrix-based features are described by Galloway et al.[3]. The element of GLRLM  $P(i, j)$  counts the number of runs  $j$  with collinearly adjacent pixels having the same

gray level intensity  $i$  as follows:

$$P(i, j) = \{j / I_1 = i, I_2 = i, \dots, I_j = i\}$$

where  $I_1, I_2, \dots, I_j$  are collinearly adjacent voxels.

The GLRLM feature value was derived by considering all the 13 directions simultaneously, thus arriving at a single matrix. Let  $P(i, j)$  be the  $(i, j)$  th entry in the given run-length matrix,  $N_g$  the number of discrete intensity values in the image,  $N_r$  the number of different run lengths,  $N_p$  the number of voxels in the image, and the entry  $(i, j)$  of the normalized GLRLM defined as:

$$p(i, j) = \frac{P(i, j)}{\sum_{i=1}^{N_g} \sum_{j=1}^{N_r} P(i, j)} \quad \mu_i = \sum_{i=1}^{N_g} i \sum_{j=1}^{N_r} p(i, j) \quad \mu_j = \sum_{j=1}^{N_r} j \sum_{i=1}^{N_g} p(i, j)$$

Then the GLRLM-based features are defined as:

1. Short Run Emphasis (SRE):

$$SRE = \sum_{i=1}^{N_g} \sum_{j=1}^{N_r} \left[ \frac{p(i, j)}{j^2} \right]$$

2. Long Run Emphasis (LRE):

$$LRE = \sum_{i=1}^{N_g} \sum_{j=1}^{N_r} j^2 p(i, j)$$

3. Gray Level Non-Uniformity (GLN):

$$GLN = \sum_{i=1}^{N_g} \left[ \sum_{j=1}^{N_r} p(i, j) \right]^2$$

4. Run Length Non-Uniformity (RLN):

$$RLN = \sum_{j=1}^{N_r} \left[ \sum_{i=1}^{N_g} p(i, j) \right]^2$$

5. Run Percentage (RP):

$$RP = \sum_{i=1}^{N_g} \sum_{j=1}^{N_r} \frac{p(i, j)}{N_p}$$

6. Low Gray Level Run Emphasis (LGRE):

$$LGRE = \sum_{i=1}^{N_g} \sum_{j=1}^{N_r} \left[ \frac{p(i, j)}{i^2} \right]$$

7. High Gray Level Run Emphasis (HGRE):

$$HGRE = \sum_{i=1}^{N_g} \sum_{j=1}^{N_r} i^2 p(i, j)$$

8. Short Run Low Gray Level Emphasis (SRLGE):

$$SRLGE = \sum_{i=1}^{N_g} \sum_{j=1}^{N_r} \left[ \frac{p(i, j)}{i^2 j^2} \right]$$

9. Short Run High Gray Level Emphasis (SRHGE):

$$SRHGE = \sum_{i=1}^{N_g} \sum_{j=1}^{N_r} \left[ \frac{p(i, j) i^2}{j^2} \right]$$

10. Long Run Low Gray Level Emphasis (LRLGE):

$$LRLGE = \sum_{i=1}^{N_g} \sum_{j=1}^{N_r} \left[ \frac{p(i, j) j^2}{i^2} \right]$$

11. Long Run High Gray Level Emphasis (LRHGE):

$$LRHGE = \sum_{i=1}^{N_g} \sum_{j=1}^{N_r} p(i, j) i^2 j^2$$

12. Gray Level Variance (GLV)

$$GLV = \frac{1}{N_g \times N_r} \sum_{i=1}^{N_g} \sum_{j=1}^{N_r} (ip(i, j) - \mu_i)^2$$

13. Run length Variance (RLV)

$$RLV = \frac{1}{N_g \times N_r} \sum_{i=1}^{N_g} \sum_{j=1}^{N_r} (jp(i, j) - \mu_j)^2$$

● **Gray Level Size Zone Matrix-based features (GLSZM)-13**

Gray-level size-zone matrix-based features, was described in [1]. GLSZM describes the number of a certain size zone  $j$  having same intensity  $i$  within N-connected neighbors in a 3D space as follows:

$$P(i, j) = \{ j / I_1 = i, I_2 = i, \dots, I_j = i \}$$

where voxels  $I_1, I_2, \dots, I_j$  are within N-connected neighbors (N=26).

Let  $P(i, j)$  be the  $(i, j)th$  entry in the given size-zone matrix,  $N_g$  the number of discrete intensity values in the image,  $N_z$  the size of the largest homogeneous region in the volume of interest, and  $N_\alpha$  the number homogeneous zones in the image. The entry  $(i, j)$  of the GLSZM are then normalized as:

$$p(i, j) = \frac{P(i, j)}{\sum_{i=1}^{N_g} \sum_{j=1}^{N_z} P(i, j)} \quad \mu_i = \sum_{i=1}^{N_g} i \sum_{j=1}^{N_z} p(i, j) \quad \mu_j = \sum_{j=1}^{N_z} j \sum_{i=1}^{N_g} p(i, j)$$

The GLSZM-based features are then defined as:

1. Small Zone Emphasis (SZE):

$$SZE = \sum_{i=1}^{N_g} \sum_{j=1}^{N_z} \left[ \frac{p(i, j)}{j^2} \right]$$

2. Large Zone Emphasis (LZE):

$$LZE = \sum_{i=1}^{N_g} \sum_{j=1}^{N_z} j^2 p(i, j)$$

3. Gray Level Non-uniformity (GLN) also called Intensity Variability (IV) in[4]:

$$GLN = \sum_{i=1}^{N_g} \left[ \sum_{j=1}^{N_z} p(i, j) \right]^2$$

4. Zone Size Non-uniformity (ZSN) also called Size Zone Variability (SZV) in[4]:

$$ZSN = \sum_{j=1}^{N_z} \left[ \sum_{i=1}^{N_g} p(i, j) \right]^2$$

5. Zone Percentage (ZP):

$$ZP = \sum_{i=1}^{N_g} \sum_{j=1}^{N_z} \frac{p(i, j)}{N_\alpha}$$

6. Low Gray Level Zone Emphasis (LGZE) also called Low Intensity Emphasis (LIE) in[4]:

$$LGZE = \sum_{i=1}^{N_g} \sum_{j=1}^{N_z} \left[ \frac{p(i, j)}{i^2} \right]$$

7. High Gray level Zone Emphasis (HGZE) also called High Intensity Emphasis (HIE) in[4]:

$$HGZE = \sum_{i=1}^{N_g} \sum_{j=1}^{N_z} i^2 p(i, j)$$

8. Small Zone Low Gray Level Emphasis (SZLGE) also called Low Intensity Small Area Emphasis (LISAE) in[4]:

$$SZLGE = \sum_{i=1}^{N_g} \sum_{j=1}^{N_z} \left[ \frac{p(i, j)}{i^2 j^2} \right]$$

9. Small Zone High Gray-Level Emphasis (SZHGE) also called High Intensity Small Area Emphasis (HISAE) in[4]:

$$SZHGE = \sum_{i=1}^{N_g} \sum_{j=1}^{N_z} \left[ \frac{p(i, j) i^2}{j^2} \right]$$

10. Large Zone Low Gray-Level Emphasis (LZLGE) also called Low Intensity Large Area Emphasis (LILAE) in[4]:

$$LZLGE = \sum_{i=1}^{N_g} \sum_{j=1}^{N_z} \left[ \frac{p(i, j) j^2}{i^2} \right]$$

11. Large Zone High Gray-Level Emphasis (LZHGE) also called High Intensity Large Area Emphasis (HILAE) in[4]:

$$LZHGE = \sum_{i=1}^{N_g} \sum_{j=1}^{N_z} p(i, j) i^2 j^2$$

12. Gray Level Variance (GLV)

$$GLV = \frac{1}{N_g \times N_z} \sum_{i=1}^{N_g} \sum_{j=1}^{N_z} (ip(i, j) - \mu_i)^2$$

13. Zone Size Variance (ZSV)

$$ZSV = \frac{1}{N_g \times N_z} \sum_{i=1}^{N_g} \sum_{j=1}^{N_z} (jp(i, j) - \mu_j)^2$$

where zone aforesaid also called area in[4].

● **Neighborhood Gray Tone Difference Matrix-based features (NGTDM)-5**

NGTDM is a column matrix[5]. Denote the  $i^{th}$  entry of the NGTDM as  $P(i)$ , defined as:

$$P(i) = \begin{cases} \sum_{i \in \{N_i\}} |i - \bar{A}_i| & \text{if } N_i > 0, \\ 0 & \text{otherwise.} \end{cases}$$

where  $\{N_i\}$  is the set of all voxels with gray-level  $i$  in tumor volume (including the peripheral region),  $N_i$  is the number of voxels with gray-level  $i$  in tumor volume, and  $\bar{A}_i$  is the average gray level of the  $M$  connected neighbors around a center voxel  $V(i, j, k)$  with gray level  $i$ .

Also, we have

$$\bar{A}_i = \bar{A}(j, k, l) = \frac{1}{M} \sum_{m=-d}^d \sum_{n=-d}^d \sum_{s=-d}^d V(j+m, k+n, l+s), (m, n, l) \neq (0, 0, 0)$$

where  $d=1$ , specifies the window size as  $3 \times 3 \times 3$ , and  $M = (2d+1)^3 - 1$ . The quantity

$n_i = \frac{N_i}{N}$  is also defined, where  $N$  is the total number of voxels in tumor volume. The

NGTDM-based features are then defined as:

1. Coarseness:

$$coarseness = [\varepsilon + \sum_{i=1}^{N_g} n_i P(i)]^{-1}$$

where  $\varepsilon$  is a small number to prevent coarseness becoming infinite,  $N_g$  the number of discrete

intensity values in the image.

2. Contrast:

$$contrast = \left[ \frac{1}{N_g \times (N_g - 1)} \sum_{i=1}^{N_g} \sum_{j=1}^{N_g} n_i n_j (i - j)^2 \right] \times \left[ \frac{1}{N} \sum_{i=1}^{N_g} P(i) \right]$$

3. Busyness:

$$busyness = \frac{\sum_{i=1}^{N_g} n_i P(i)}{\sum_{i=1}^{N_g} \sum_{j=1}^{N_g} |in_i - jn_j|}, n_i \neq 0, n_j \neq 0$$

4. Complexity:

$$complexity = \sum_{i=1}^{N_g} \sum_{j=1}^{N_g} \frac{|i - j| [n_i P(i) + n_j P(j)]}{N(n_i + n_j)}, n_i \neq 0, n_j \neq 0$$

5. Strength:

$$strength = \frac{\sum_{i=1}^{N_g} \sum_{j=1}^{N_g} (n_i + n_j)(i - j)^2}{\varepsilon + \sum_{i=1}^{N_g} P(i)}, n_i \neq 0, n_j \neq 0$$

where  $\varepsilon$  is a small number to prevent strength becoming infinite.
